# Supplementary material for: CTAB-assisted multiwalled carbon nanotube-loaded NaFe2Mn(PO4)3 materials as high performance cathodes for sodium-ion batteries
Source: Royal Society of Chemistry journal article supplement (doi:10.1039/c6ra12708h), 2016-01-01
Supplement: c6ra12708h1.pdf [file c6ra12708h1.pdf]

Supporting Information

**CTAB-assisted Multiwalled Carbon Nanotube-Loaded  
NaFe<sub>2</sub>Mn(PO<sub>4</sub>)<sub>3</sub> materials as High Performance Cathodes  
for Sodium-Ion Batteries**

*Xiaofeng Wang,<sup>a</sup> Hao Zhang,<sup>a</sup> Yanan Xu,<sup>a</sup> Chengcheng Chen,<sup>a</sup> Huatang Yuan,<sup>a</sup> and Yijing*

*Wang<sup>\*a,b</sup>*

<sup>a</sup>Key Laboratory of Advanced Energy Materials Chemistry (MOE)

<sup>b</sup>Collaborative Innovation Center of Chemical Science and Engineering (Tianjin), College of

Chemistry, Nankai University

*Tianjin 300071 (P. R. China),*

*Fax: +86 22 23503639; E-mail: wangyj@nankai.edu.cn.*

## List

**Fig. S1.** SEM images of annealed  $\text{NaFe}_2\text{Mn}(\text{PO}_4)_3$  samples with the various content of MWCNTs.

(a) 1 %, (b) 2 %, (c) 3 %.

**Fig. S2.** HRTEM images of different annealed  $\text{NaFe}_2\text{Mn}(\text{PO}_4)_3$  samples. (a) The pristine  $\text{NaFe}_2\text{Mn}(\text{PO}_4)_3$  sample, (b) Sample S1, (c) Sample S2, (d) Sample S3

**Fig. S3.** CV performance for  $\text{NaFe}_2\text{Mn}(\text{PO}_4)_3$  / MWCNTs material.

**Fig. S4.** XPS spectra for the  $\text{NaFe}_2\text{Mn}(\text{PO}_4)_3$  / MWCNTs materials in the discharge and charge process. (a, b) The Fe 2p, Mn 2p XPS spectra for the  $\text{NaFe}_2\text{Mn}(\text{PO}_4)_3$  / MWCNTs material in the charge process, (c, d) The Fe 2p, Mn 2p XPS spectra for the  $\text{NaFe}_2\text{Mn}(\text{PO}_4)_3$  / MWCNTs material in the discharge process.

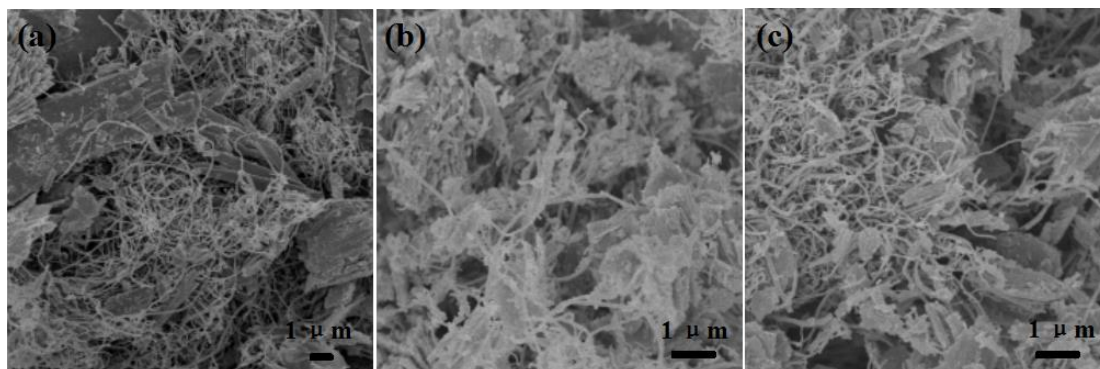

**Fig. S1.** SEM images of annealed  $\text{NaFe}_2\text{Mn}(\text{PO}_4)_3$  samples with the various content of MWCNTs.

(a) 1 %, (b) 2 %, (c) 3 %.

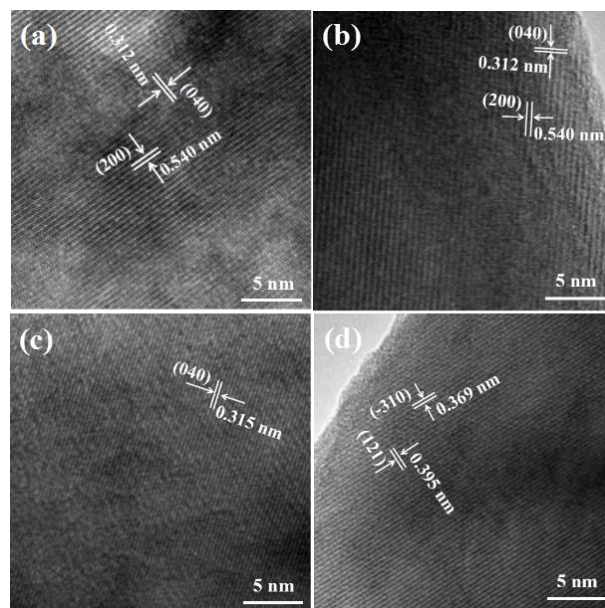

**Fig. S2.** HRTEM images of different annealed  $\text{NaFe}_2\text{Mn}(\text{PO}_4)_3$  samples. (a) The pristine

$\text{NaFe}_2\text{Mn}(\text{PO}_4)_3$  sample, (b) Sample S1, (c) Sample S2, (d) Sample S3

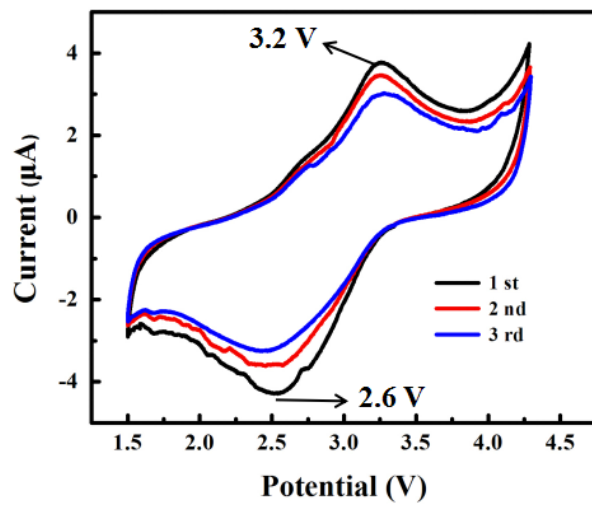

**Fig. S3.** CV performance for NaFe<sub>2</sub>Mn(PO<sub>4</sub>)<sub>3</sub> / MWCNTs material

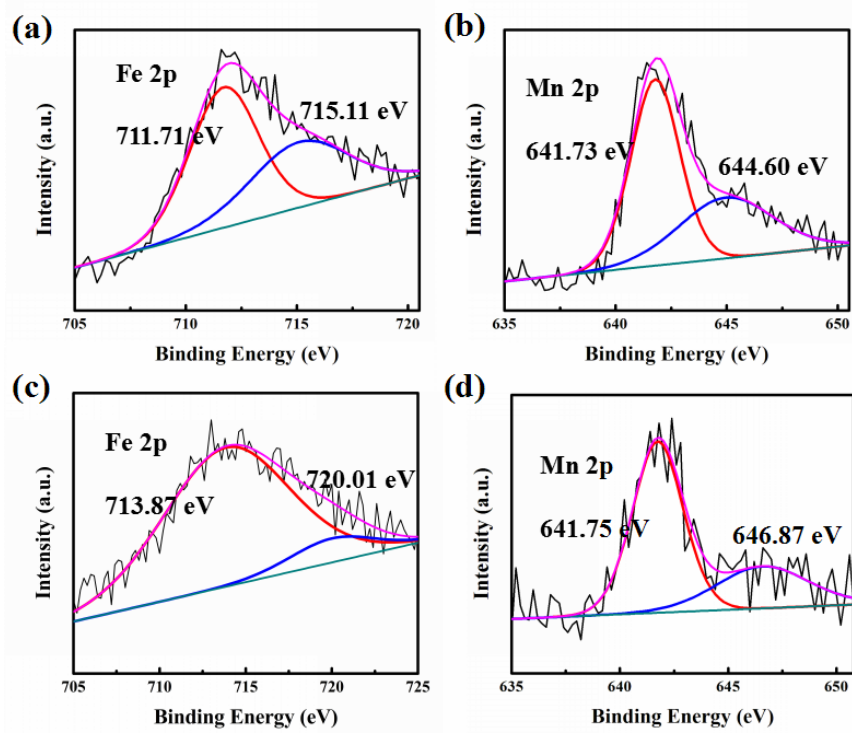

**Fig. S4.** XPS spectra for the  $\text{NaFe}_2\text{Mn}(\text{PO}_4)_3 / \text{MWCNTs}$  materials in the discharge and charge process. (a, b) The Fe 2p, Mn 2p XPS spectra for the  $\text{NaFe}_2\text{Mn}(\text{PO}_4)_3 / \text{MWCNTs}$  material in the charge process, (c, d) The Fe 2p, Mn 2p XPS spectra for the  $\text{NaFe}_2\text{Mn}(\text{PO}_4)_3 / \text{MWCNTs}$  material in the discharge process
